# Supplementary material
Source: MDPI journal article supplement (https://www.mdpi.com/2073-4395/11/2/305)
Supplement: s1 [file s1]

**Table S1.** Correlation coefficient analysis between antioxidant activity, TPC and TFC.

| Parameters | TFC   | TPC  | DPPH   | ABTS |
|------------|-------|------|--------|------|
| TFC        | 1     |      |        |      |
| TPC        | .542  | 1    |        |      |
| DPPH       | .859* | .154 | 1      |      |
| ABTS       | .898* | .121 | .946** | 1    |

\*. Correlation is significant at the 0.05 level (2-tailed).

\*\*. Correlation is significant at the 0.01 level (2-tailed).

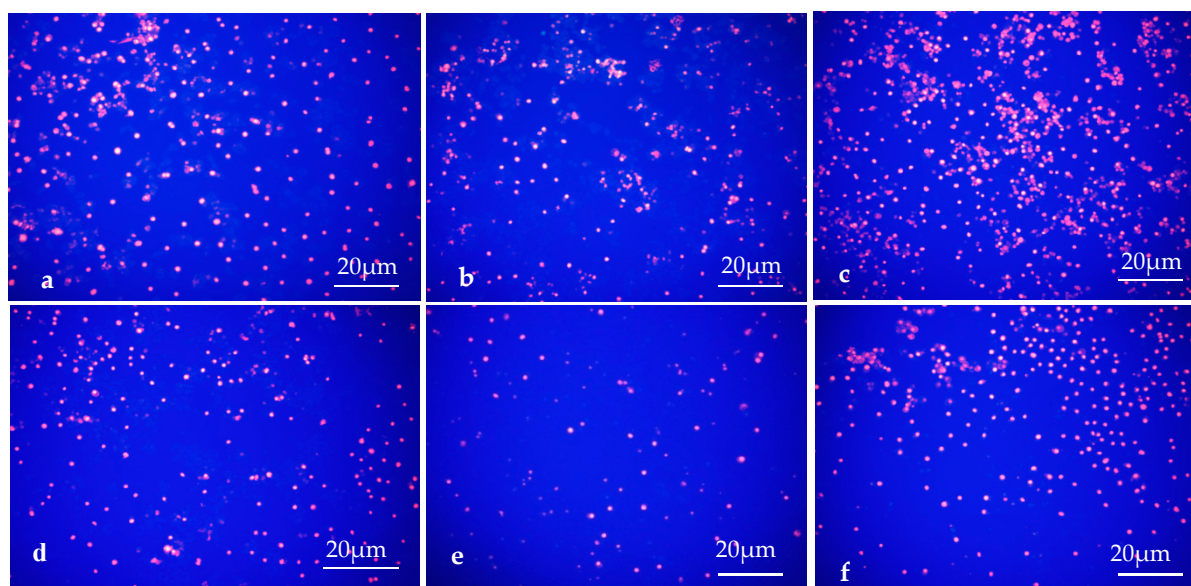

**Figure S1.** Cytotoxic effect of peanut sprout on RAW 264.7 cells. (a) FI light, (b) Red-LED, (c) Blue-LED, (d) Green-LED, (e) MEL, (f) UI.
